# Supplementary material for: TRIB3 Mediates Fibroblast Activation and Fibrosis though Interaction with ATF4 in IPF
Source: MDPI journal article supplement (doi:10.3390/ijms232415705), 2022-12-11
Supplement: s1 [file s1]

# Supplementary materials

Table S1 Clinical information of all patients' samples was used for RT-qPCR and western blot analyses in Fig. 1A. and Fig. 1D.

| No.     | Gender | Age (year) | Smoking status | Diagnosis                        |
|---------|--------|------------|----------------|----------------------------------|
| IPF-1   | M      | 69         | former         | Idiopathic pulmonary fibrosis    |
| IPF-2   | M      | 55         | nonsmoker      | Idiopathic pulmonary fibrosis    |
| IPF-3   | M      | 53         | nonsmoker      | Idiopathic pulmonary fibrosis    |
| IPF-4   | F      | 67         | former         | Idiopathic pulmonary fibrosis    |
| IPF-5   | M      | 62         | former         | Idiopathic pulmonary fibrosis    |
| IPF-6   | F      | 70         | former         | Idiopathic pulmonary fibrosis    |
| IPF-7   | M      | 60         | nonsmoker      | Idiopathic pulmonary fibrosis    |
| IPF-8   | F      | 79         | nonsmoker      | Idiopathic pulmonary fibrosis    |
| IPF-9   | M      | 75         | former         | Idiopathic pulmonary fibrosis    |
| IPF-10  | F      | 69         | former         | Idiopathic pulmonary fibrosis    |
| IPF-11  | M      | 44         | former         | Idiopathic pulmonary fibrosis    |
| IPF-12  | M      | 71         | nonsmoker      | Idiopathic pulmonary fibrosis    |
| IPF-13  | F      | 72         | former         | Idiopathic pulmonary fibrosis    |
| IPF-14  | M      | 60         | former         | Idiopathic pulmonary fibrosis    |
| IPF-15  | M      | 68         | former         | Idiopathic pulmonary fibrosis    |
| IPF-16  | M      | 61         | nonsmoker      | Idiopathic pulmonary fibrosis    |
| IPF-17  | M      | 53         | former         | Idiopathic pulmonary fibrosis    |
| IPF-18  | M      | 49         | former         | Idiopathic pulmonary fibrosis    |
| IPF-19  | F      | 67         | nonsmoker      | Idiopathic pulmonary fibrosis    |
| IPF-20  | M      | 72         | former         | Idiopathic pulmonary fibrosis    |
| IPF-21  | M      | 76         | former         | Idiopathic pulmonary fibrosis    |
| IPF-22  | F      | 59         | nonsmoker      | Idiopathic pulmonary fibrosis    |
| IPF-23  | F      | 51         | former         | Idiopathic pulmonary fibrosis    |
| CTRL-1  | F      | 70         | nonsmoker      | NAT lung cancer without fibrosis |
| CTRL-2  | M      | 60         | former         | NAT lung cancer without fibrosis |
| CTRL-3  | M      | 55         | nonsmoker      | NAT lung cancer without fibrosis |
| CTRL-4  | F      | 65         | former         | NAT lung cancer without fibrosis |
| CTRL-5  | F      | 63         | nonsmoker      | NAT lung cancer without fibrosis |
| CTRL-6  | M      | 72         | former         | NAT lung cancer without fibrosis |
| CTRL-7  | M      | 68         | former         | NAT lung cancer without fibrosis |
| CTRL-8  | F      | 69         | nonsmoker      | NAT lung cancer without fibrosis |
| CTRL-9  | F      | 78         | former         | NAT lung cancer without fibrosis |
| CTRL-10 | F      | 64         | nonsmoker      | NAT lung cancer without fibrosis |
| CTRL-11 | M      | 47         | former         | NAT lung cancer without fibrosis |
| CTRL-12 | F      | 70         | former         | NAT lung cancer without fibrosis |

Note: M=Male, F=Female. NAT= adjacent normal tissue

Table S1 Clinical information of all patients' samples was used for RT-qPCR and western blot analyses in Figs. 1A and Fig. 1D.

| No.     | Gender | Age (year) | Smoking status | Diagnosis                        |
|---------|--------|------------|----------------|----------------------------------|
| CTRL-13 | M      | 70         | nonsmoker      | NAT lung cancer without fibrosis |
| CTRL-14 | M      | 59         | former         | NAT lung cancer without fibrosis |
| CTRL-15 | F      | 56         | former         | NAT lung cancer without fibrosis |

Note: M=Male, F=Female. NAT= adjacent normal tissue
